# Supplementary material for: CSF1/CSF1R signaling mediates malignant pleural effusion formation
Source: JCI Insight. 2022 Mar 22;7(6):e155300. doi: 10.1172/jci.insight.155300 (PMC8986064; doi:10.1172/jci.insight.155300)

## Supplementary Data

**Supplementary Figure 1. CSF1R macrophages were successfully depleted in both pleura and tumors of *LysMCre<sup>hemi</sup>CSF1R<sup>fl/fl</sup>* mice. CSF1R+ macrophage ablation did not affect tumor foci numbers.** Mice whose macrophages are devoid of CSF1R (*LysMCre<sup>hemi</sup>CSF1R<sup>fl/fl</sup>*) or not (*LysMCre<sup>-/-</sup>CSF1R<sup>fl/fl</sup>*) were intrapleurally injected with  $1.5 \times 10^5$  LLC or MC38 murine adenocarcinoma cells. Animals were euthanized 13 days later. CSF1R+ macrophages (CD11b+/CD45+/F4/80+) were quantified among pleural (A) and tumor cells (B) using flow cytometry. LLC: *LysMCre<sup>hemi</sup>CSF1R<sup>fl/fl</sup>* n=6, *LysMCre<sup>-/-</sup>CSF1R<sup>fl/fl</sup>* n=5. MC38: *LysMCre<sup>hemi</sup>CSF1R<sup>fl/fl</sup>* n=5, *LysMCre<sup>-/-</sup>CSF1R<sup>fl/fl</sup>* n=5. \*p<0.05 compared to *LysMCre<sup>hemi</sup>CSF1R<sup>fl/fl</sup>* by 2-tailed students' T-test. (C) Lungs were harvested and visceral pleural foci were counted under a stereoscope. Data presented as mean±SEM, LLC *LysMCre<sup>hemi</sup>CSF1R<sup>fl/fl</sup>* n=15, *LysMCre<sup>-/-</sup>CSF1R<sup>fl/fl</sup>* n=10. MC38: *LysMCre<sup>hemi</sup>CSF1R<sup>fl/fl</sup>* n=10, *LysMCre<sup>-/-</sup>CSF1R<sup>fl/fl</sup>* n=7. \*p<0.05 compared to *LysMCre<sup>hemi</sup>CSF1R<sup>fl/fl</sup>* by 2-tailed students' T-test.

**Supplementary Figure 2. % CSF1R-expressing cells in main immune populations of tumors and pleural fluid of *LysMCre<sup>hemi</sup>CSF1R<sup>fl/fl</sup>* and *LysMCre<sup>-/-</sup>CSF1R<sup>fl/fl</sup>* mice bearing LLC and MC38-induced MPE.** Pleural and tumor (A) CD45+CD11b+F4/80+ macrophages, (B) CD45+CD11c+ DCs, (C) CD45+CD11b+LY6C+ monocytes, (D) CD45+CD11b+ LY6G+granulocytes and (E) CD45+CD3+ lymphocytes of LLC (left) and MC38 (right) induced MPE bearing mice were quantified in pleural fluid and tumors of *LysMCre<sup>hemi</sup>CSF1R<sup>fl/fl</sup>* and *LysMCre<sup>-/-</sup>CSF1R<sup>fl/fl</sup>* mice. LLC *LysMCre<sup>hemi</sup>CSF1R<sup>fl/fl</sup>* n=5-8, *LysMCre<sup>-/-</sup>CSF1R<sup>fl/fl</sup>* n=5-8 MC38: *LysMCre<sup>hemi</sup>CSF1R<sup>fl/fl</sup>* n=5-8, *LysMCre<sup>-/-</sup>CSF1R<sup>fl/fl</sup>* n=5-8. \*p<0.05 compared to *LysMCre<sup>hemi</sup>CSF1R<sup>fl/fl</sup>* by 2-tailed students' T-test.

**Supplementary Figure 3. Selective macrophages knockdown of CSF1R gene did not affect macrophage recruitment in the pleural space or tumors, but inhibited their polarization towards an M2 phenotype.** Pleural (A) and tumor (B) macrophages were quantified upon CD45, CD11b, F4/80 staining using flow cytometry. IL12/IL10 expression ratio (indicative of M1/M2 polarization) was also determined among pleural (C) and tumoral (d) macrophages. LLC *LysMCre<sup>hemi</sup>CSF1R<sup>fl/fl</sup>* n=10, *LysMCre<sup>-/-</sup>CSF1R<sup>fl/fl</sup>* n=6 MC38: *LysMCre<sup>hemi</sup>CSF1R<sup>fl/fl</sup>* n=5 *LysMCre<sup>-/-</sup>CSF1R<sup>fl/fl</sup>* n=5. \*p<0.05 compared to *LysMCre<sup>hemi</sup>CSF1R<sup>fl/fl</sup>* by 2-tailed students' T-test.

**Supplementary Figure 4. CSF1R+ macrophages promote immune suppression by enhancing MDSCs populations and reducing DC and CD8 T cell activation.** Pleural (left) and tumor (right) abundance of Myeloid Derived Suppressor Cells (MDSCs) of the monocytic (CD11b+/Ly6C+) (A) and granulocytic (CD11b+/Ly6G+) (B) lineage was determined in *LysMCre<sup>hemi</sup>CSF1R<sup>fl/fl</sup>* or *LysMCre<sup>-/-</sup>CSF1R<sup>fl/fl</sup>* animals by flow cytometry. (C) Total and (D) Activated (MHCII+) dendritic cells (CD45+/CD11C+) (E) total CD8 T cell numbers and (F) activated (granzyme-B+) CD8+ lymphocytes were also evaluated in pleural fluid and tumors of animals with CSF1R+ and CSF1R- macrophages. Data presented as mean±SEM, n=5-6, for all groups \*p<0.05 compared to *LysMCre<sup>hemi</sup>CSF1R<sup>fl/fl</sup>* by 2-tailed students' T-test.

**Supplementary Figure 5. CSF1R+ macrophage ablation does not significantly alter the pleural and tumor cytokine milieu.** Pro-inflammatory mediators central to MPE formation (IL-6, VEGF, MCP-1, TNF-alpha, OPN and MIP-2) were determined in pleural fluid (a, b) and tumor lysates (c, d) of LLC or MC38 tumor bearing CSF1R+macros or CSF1R-macros-mice. Data presented as mean±SEM, n=5-6, for all groups \*p<0.05 compared to *LysMCre<sup>hemi</sup>CSF1R<sup>fl/fl</sup>* by 2-tailed students' T-test.

**Supplementary Figure 6. Pharmacological targeting of CSF1R attenuates tumor foci formation.** Representative pictures (taken under a stereoscope equipped with a digital camera) of lungs retrieved from CSF1Ri or vehicle treated mice. Magnification: 48x. Arrows depict tumor foci.

**Supplementary Figure 7. CSF1R blockade does not affect the viability of LLC or MC38 tumor cells.** (a,b) LLC or MC38 murine adenocarcinoma cells were seeded at  $3 \times 10^3$  cells/well in 96-well plates. The day after, cells were treated with vehicle or CSF1Ri (6.7-6700 nM) and 24 h later cell viability was measured by XTT reduction. Data are presented as mean±SEM, n=6 for each group, \*p<0.05 compared to vehicle by 2-tailed students' T test.

**Supplementary Figure 8. CSF1R+ macrophage ablation does not affect CAF populations.** CAFs in LLC or MC38 tumors from *LysMCre<sup>hemi</sup>CSF1R<sup>fl/fl</sup>* and *LysMCre<sup>-/-</sup>CSF1R<sup>fl/fl</sup>* mice were visualized upon FAPA staining using immunohistochemistry. (A) Representative pictures and (B) results of image analysis. Data presented as mean±SEM, n=5 for all groups \*p<0.05 compared to *LysMCre<sup>hemi</sup>CSF1R<sup>fl/fl</sup>* by 2-tailed students' T-test.

**Supplementary Figure 9. Tumor dissemination on the 4th day upon intrapleural tumor cell implantation.** (A, B) Representative pictures (taken under a stereoscope equipped with a digital camera) of tumor foci present on the lungs (A, B) of LLC injected mice. Magnification (A, B): 48X. Arrows depict tumor foci.

Supplementary Figure 1

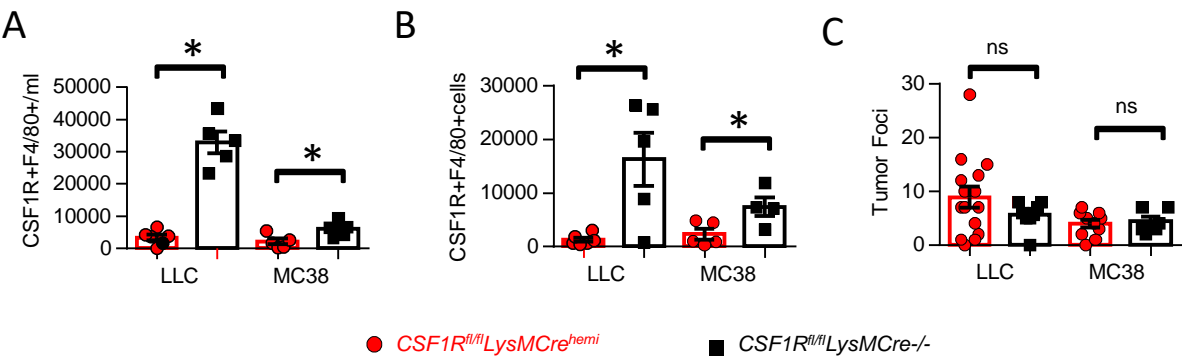

Supplementary Figure 2

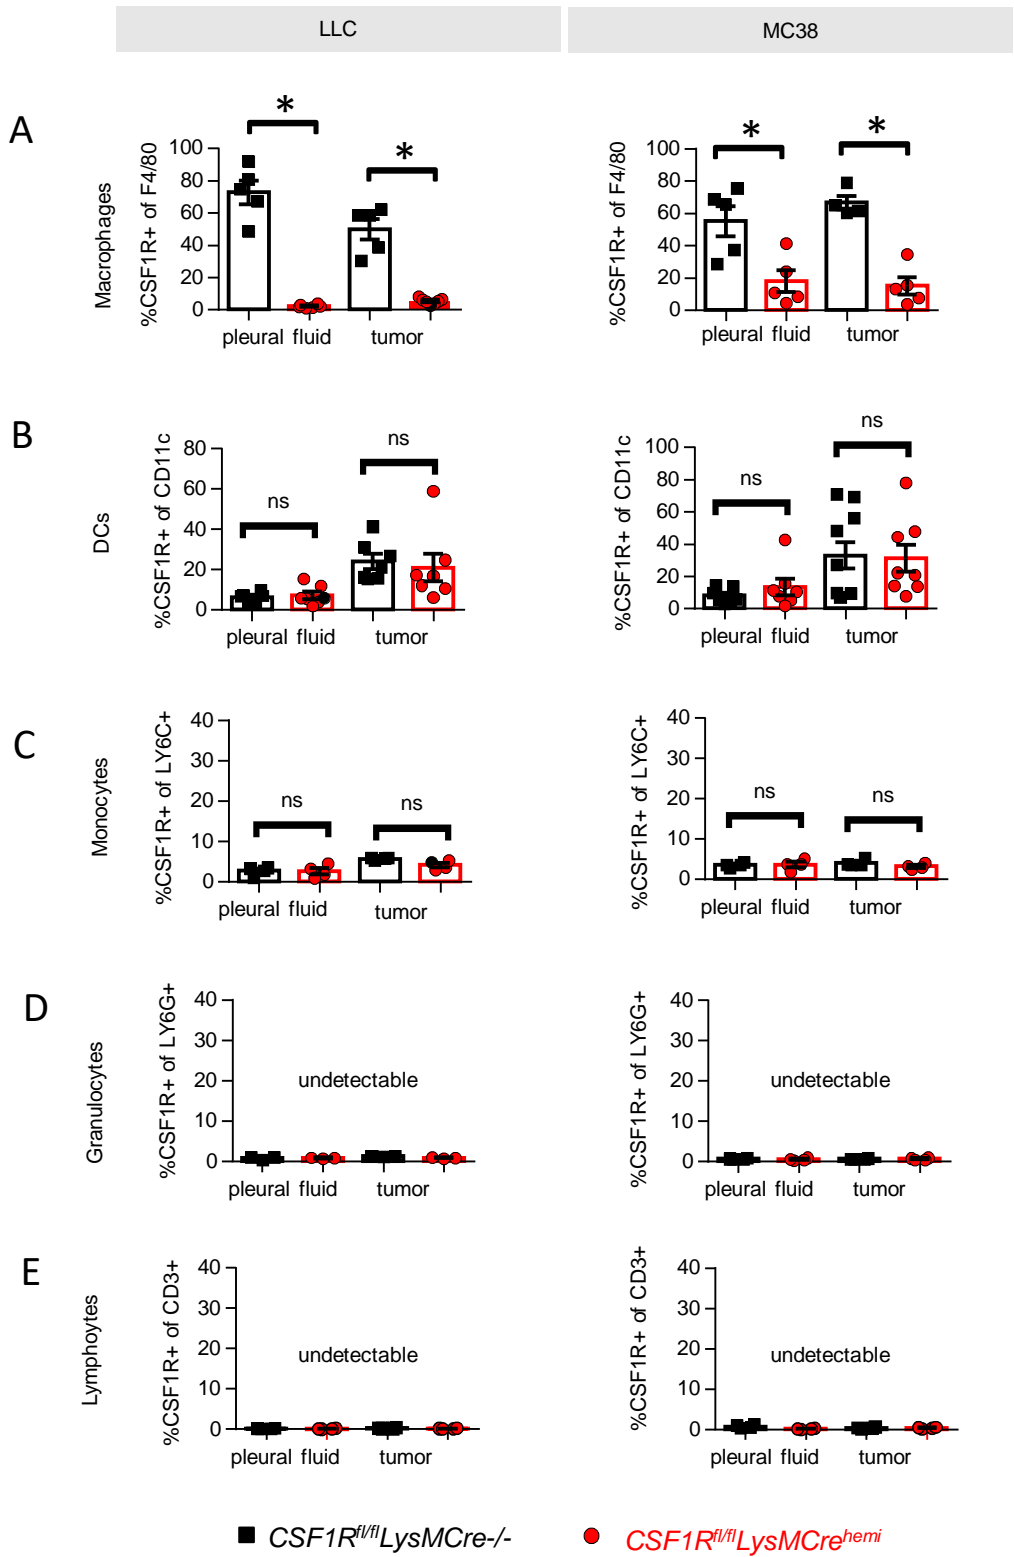

Supplementary Figure 3

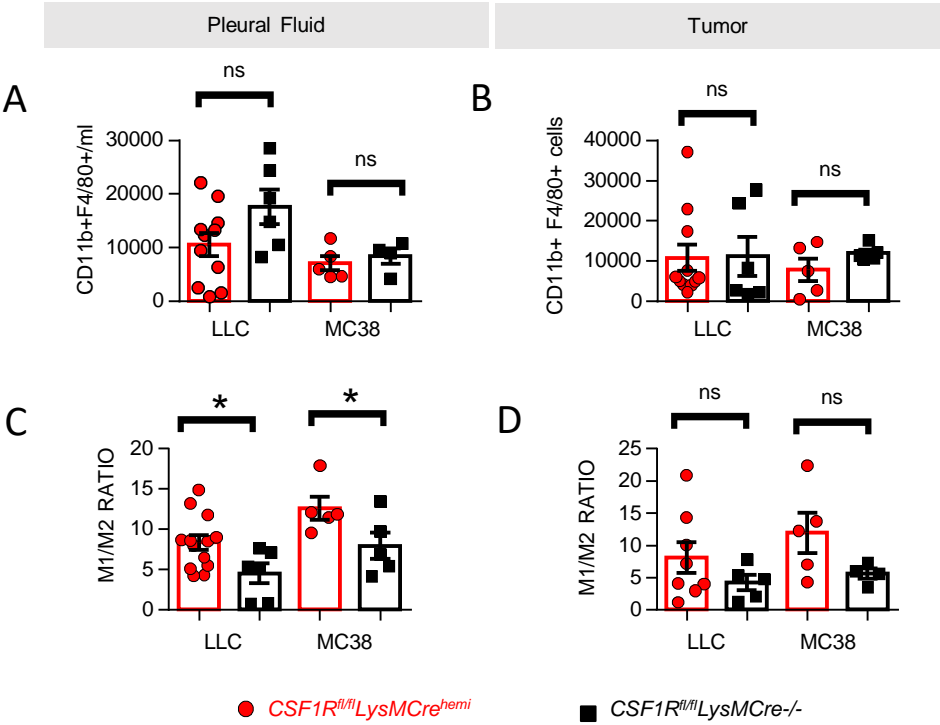

Supplementary Figure 4

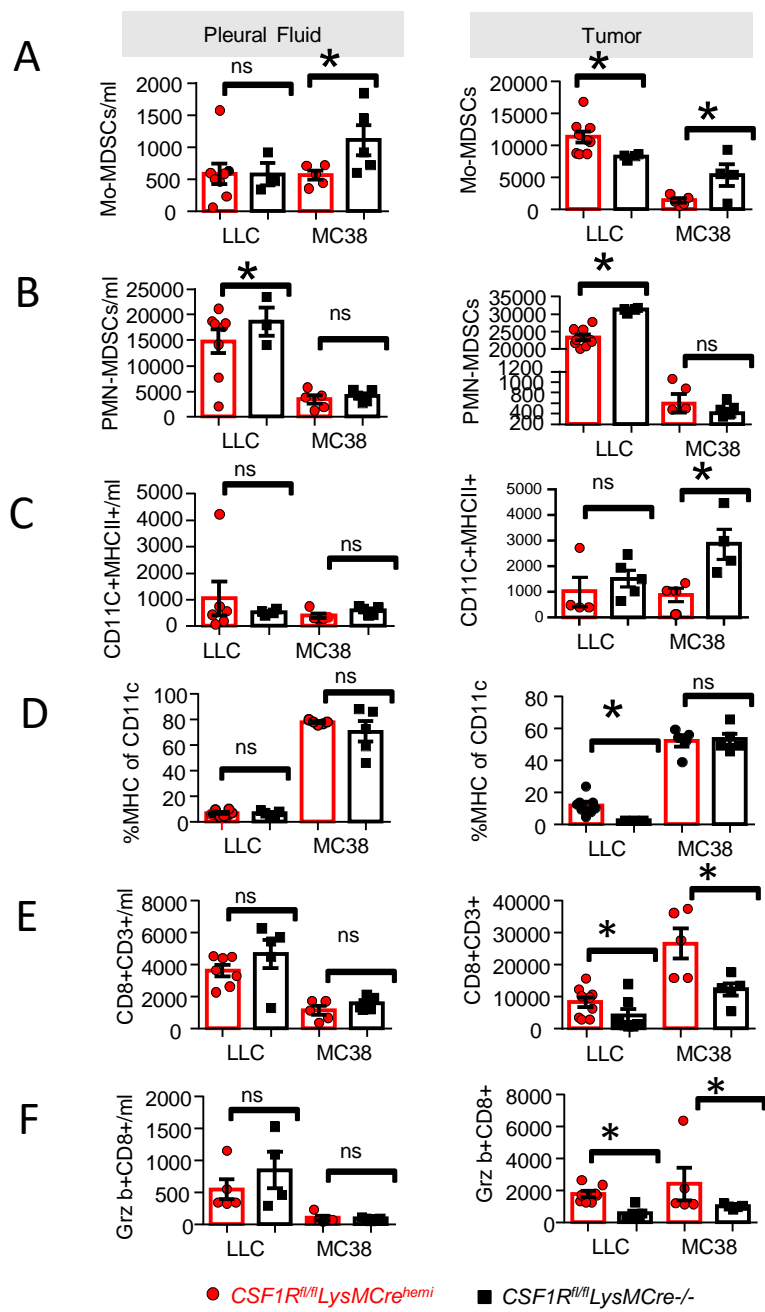

Supplementary Figure 5

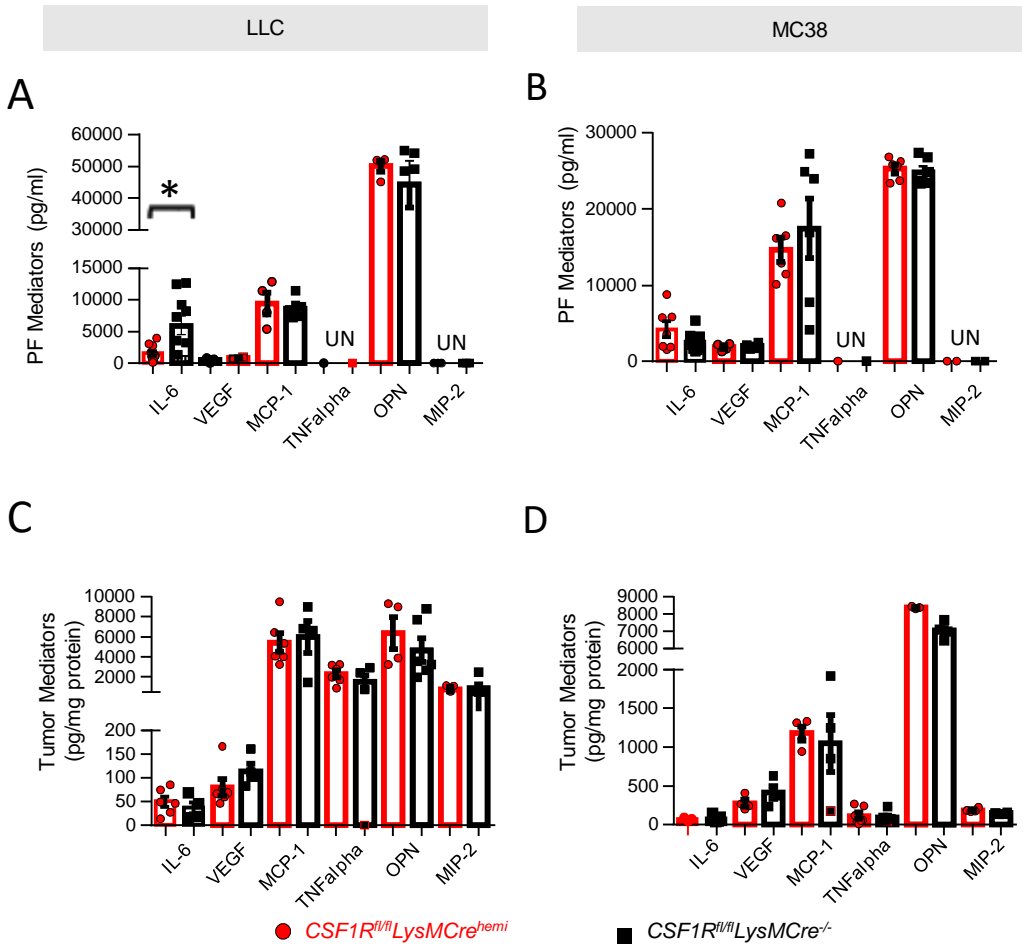

Supplementary Figure 6

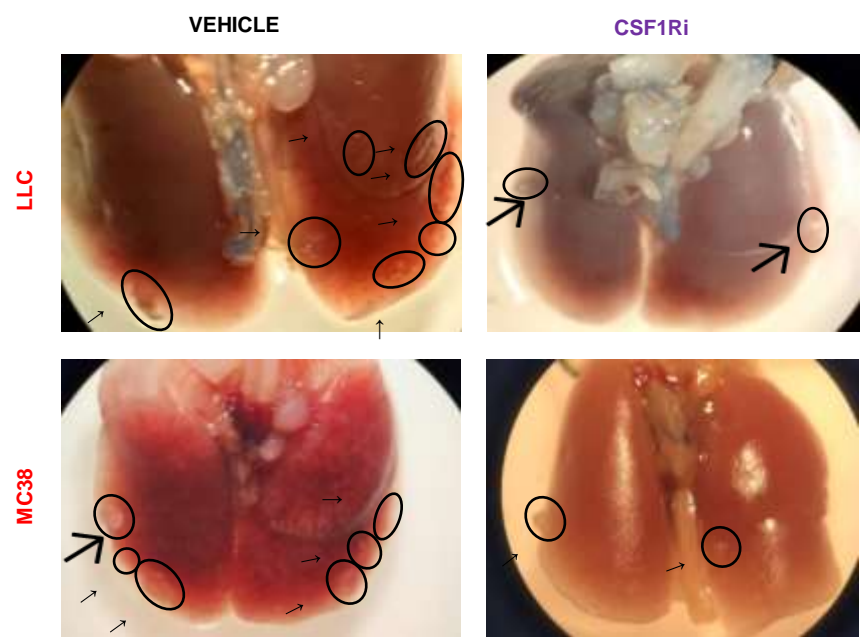

Supplementary Figure 7

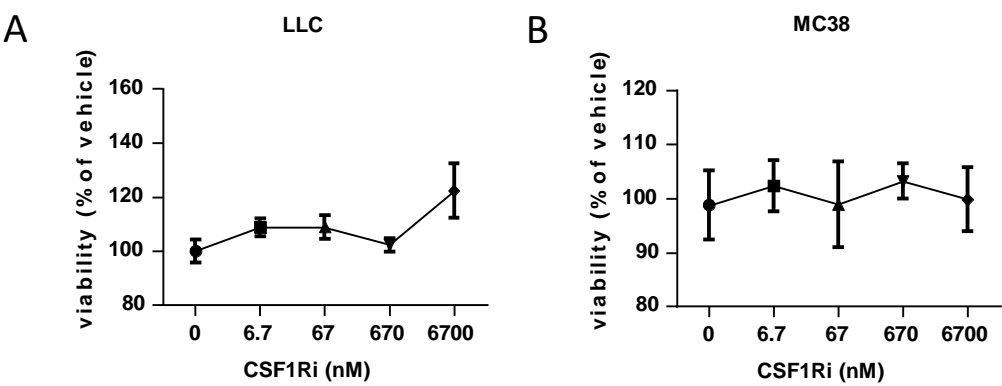

Supplementary Figure 8

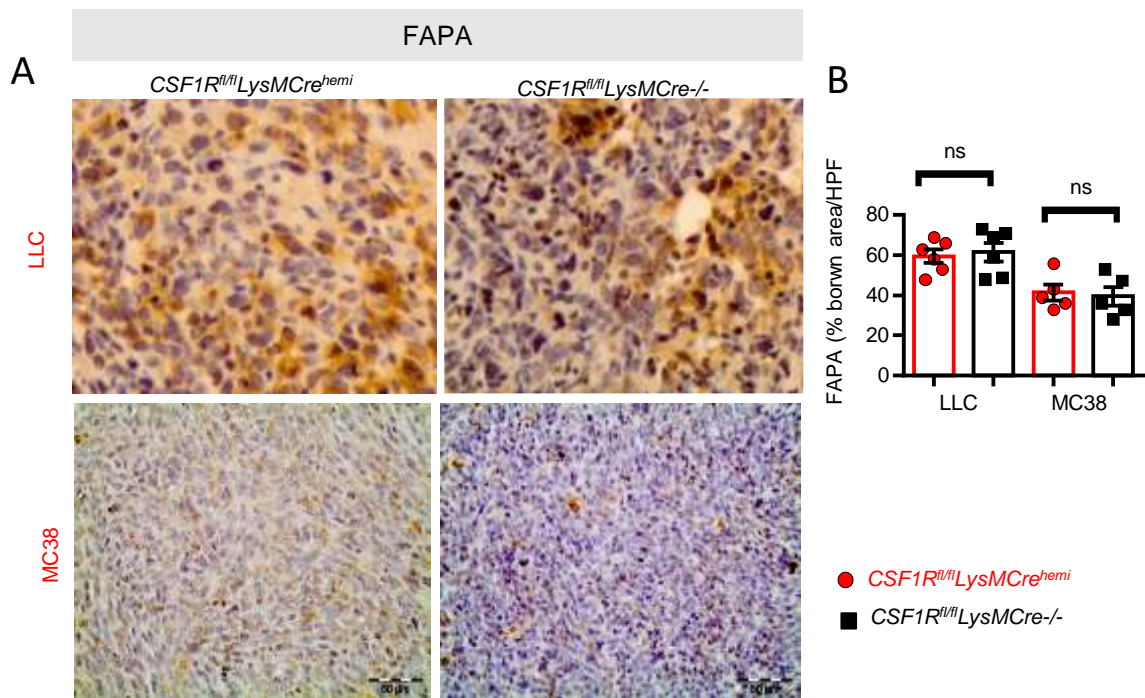

Supplementary Figure 9

A

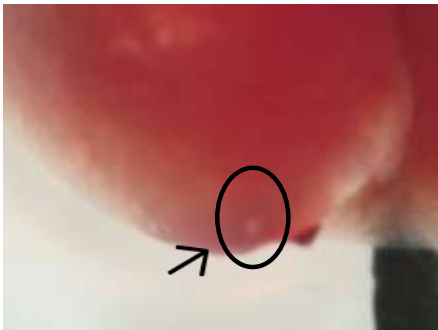

B

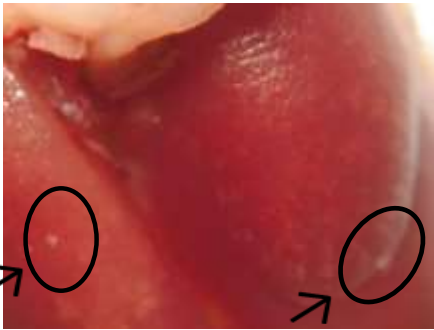

Supplement: Supplemental data [file jciinsight-7-155300-s147.pdf]
